# Supplementary material for: Synthesis and crystal structures of lanthanide 4-benzyloxy benzoates: Influence of electron-withdrawing and electron-donating groups on luminescent properties
Source: Royal Society of Chemistry journal article supplement (doi:10.1039/b917256d), 2009-11-17
Supplement: b917256d.pdf [file b917256d.pdf]

## Supplementary Information

### **Synthesis and crystal structures of lanthanide 4-benzyloxy benzoates: Influence of electron-withdrawing and electron-donating groups on luminescent properties**

Sarika Sivakumar,<sup>a</sup> M. L. P. Reddy,<sup>\*a</sup> Alan H. Cowley<sup>b</sup> and Kalyan V. Vasudevan<sup>b</sup>

<sup>a</sup>*Chemical Sciences and Technology Division, National Institute for Interdisciplinary  
Science & Technology (NIIST), Thiruvananthapuram-695 019, India*

<sup>b</sup>*Department of Chemistry and Biochemistry, The University of Texas at Austin, 1  
University Station A5300, Austin, Texas 78712*

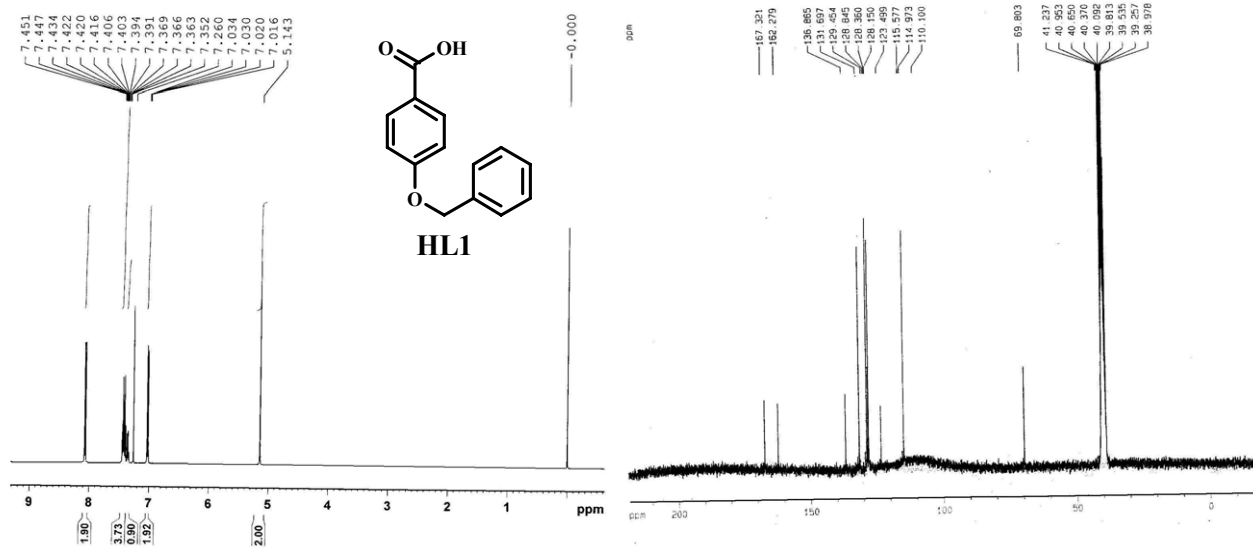

Fig. S1 <sup>1</sup>H NMR spectrum of HL1 in CDCl<sub>3</sub> and <sup>13</sup>C NMR in DMSO-d<sub>6</sub> solutions.

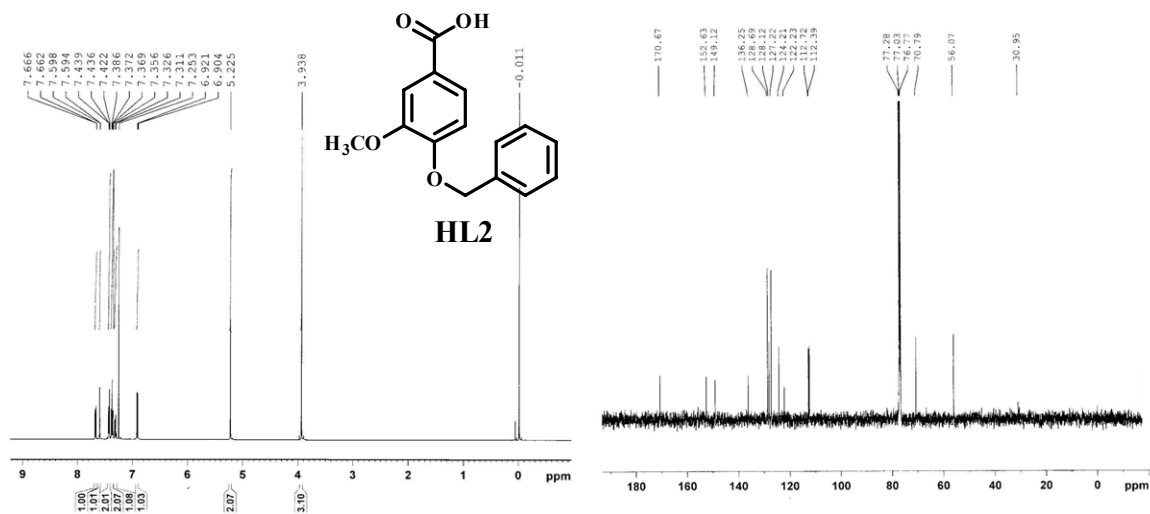

Fig. S2 <sup>1</sup>H and <sup>13</sup>C NMR spectra of HL2 in CDCl<sub>3</sub> solution.

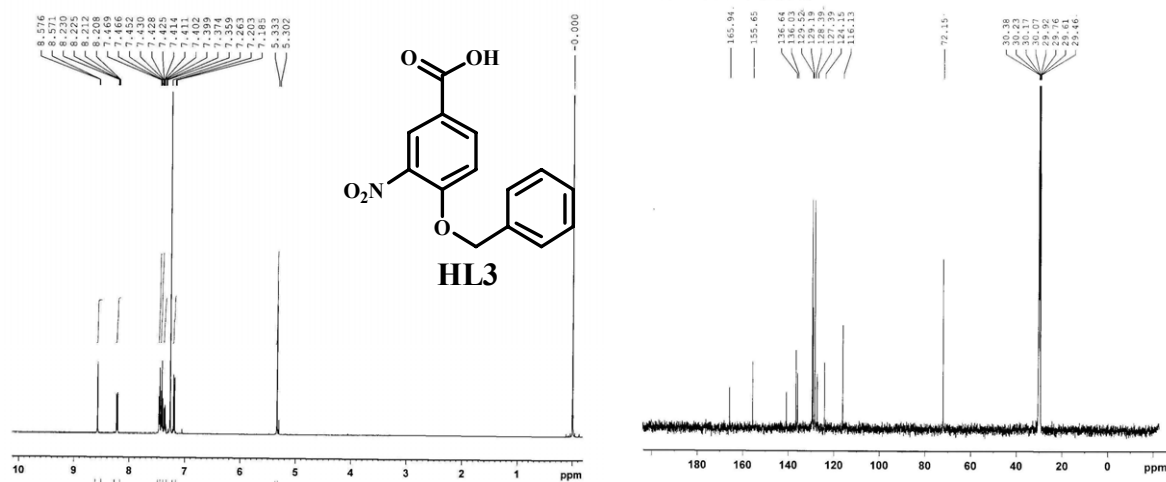

**Fig. S3** <sup>1</sup>H NMR spectrum of HL3 in CDCl<sub>3</sub> solution and <sup>13</sup>C NMR in acetone-d<sub>6</sub> solution.

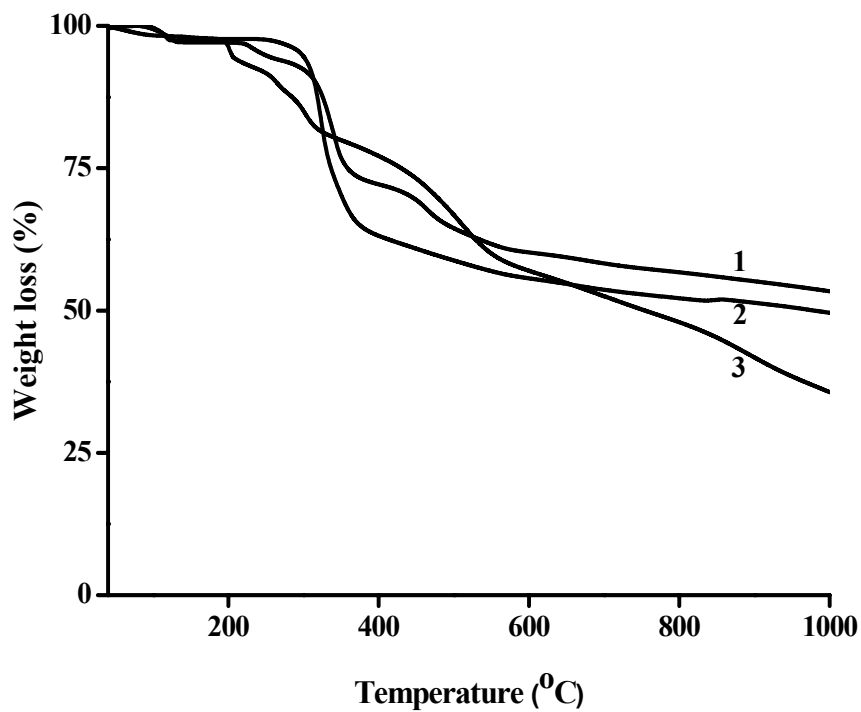

**Fig. S4** Thermogravimetric plot for complexes 1-3.

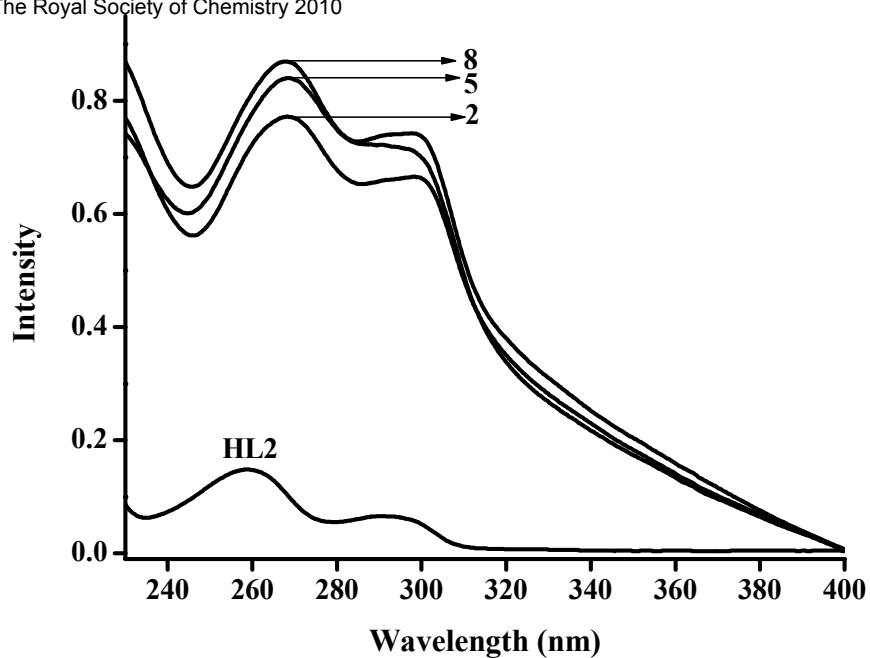

**Fig. S5** UV-visible absorption spectra of 3-methoxy-4-benzyloxy benzoic acid and complexes **2**, **5** and **8** in  $\text{CH}_3\text{CN}$  solution ( $2 \times 10^{-5}$  M).

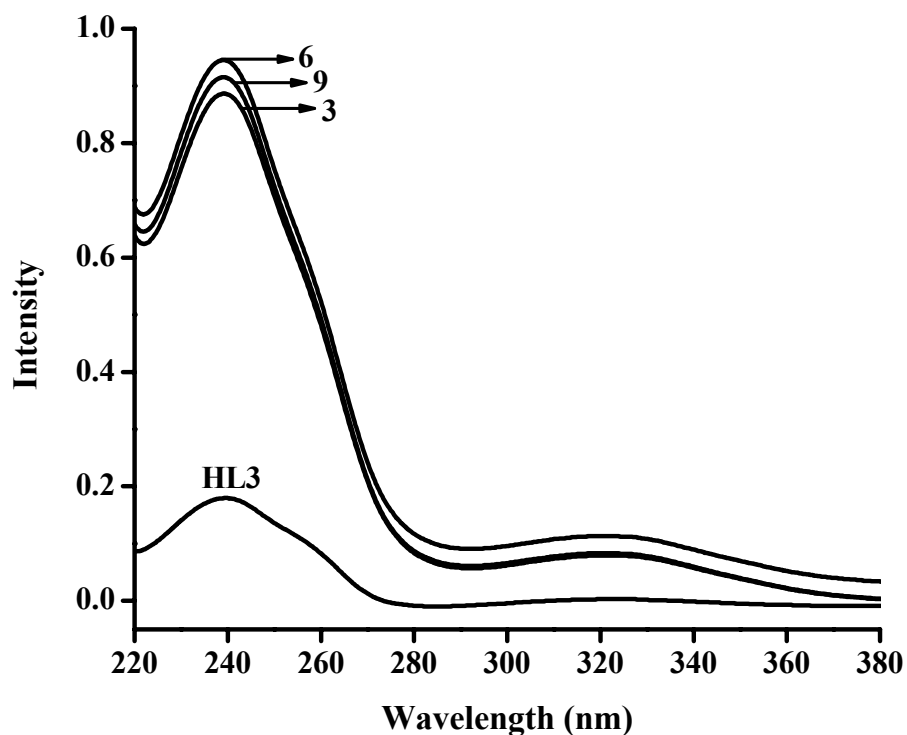

**Fig. S6** UV-visible absorption spectra of 4-(benzyloxy)-3-nitro benzoic acid and complexes **3**, **6** and **9** in  $\text{CH}_3\text{CN}$  solution ( $2 \times 10^{-5}$  M).

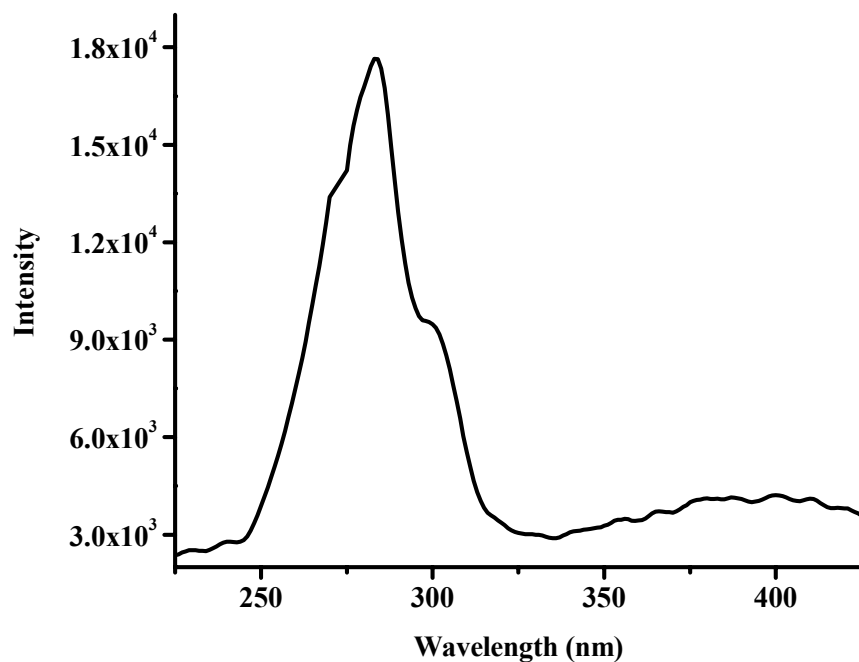

Fig. S7 Room-temperature excitation spectrum for complex 3.

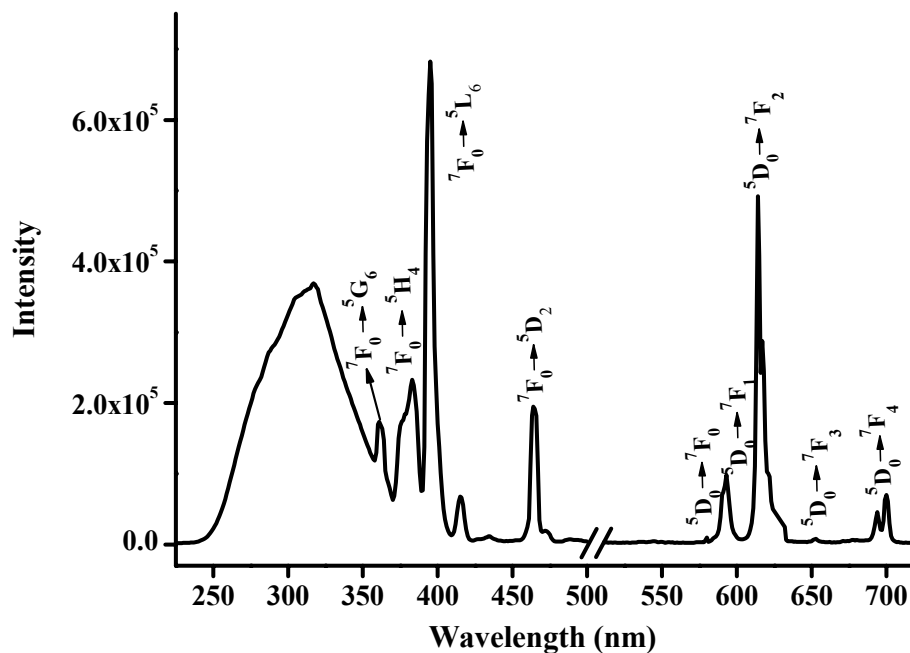

Fig. S8 Room-temperature excitation and emission spectra for complex 4 ( $\lambda_{\text{ex}} = 314$  nm) with emission monitored at approximately 612 nm.

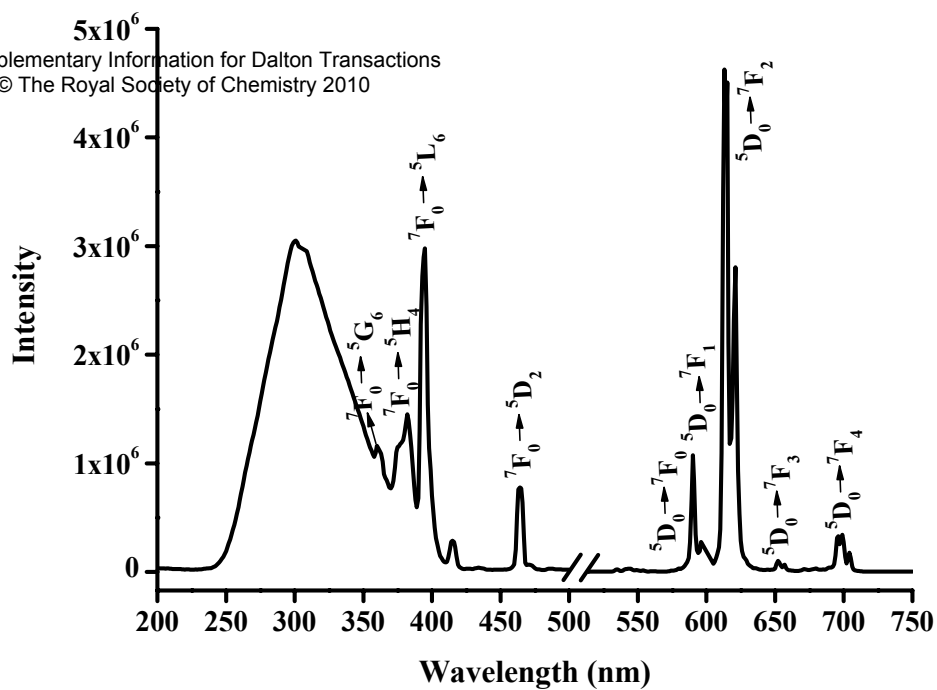

**Fig. S9** Room-temperature excitation and emission spectra for complex **5** ( $\lambda_{\text{ex}} = 300\text{nm}$ ) with emission monitored at approximately 612 nm.

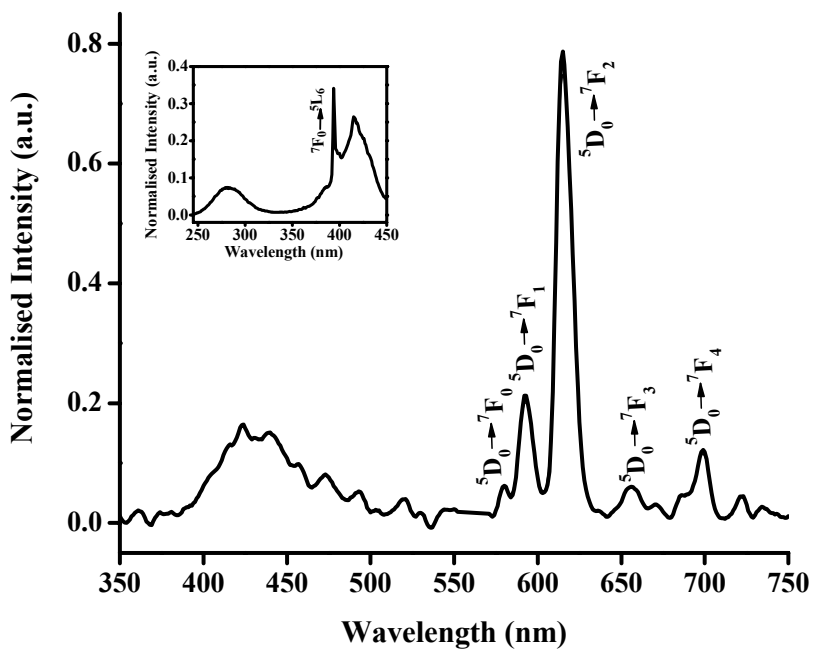

**Fig. S10** Room-temperature emission spectrum for complex **6** ( $\lambda_{\text{ex}} = 280\text{ nm}$ ). (Inset shows the excitation spectrum of the complex **6** with emission monitored at approximately 612 nm).

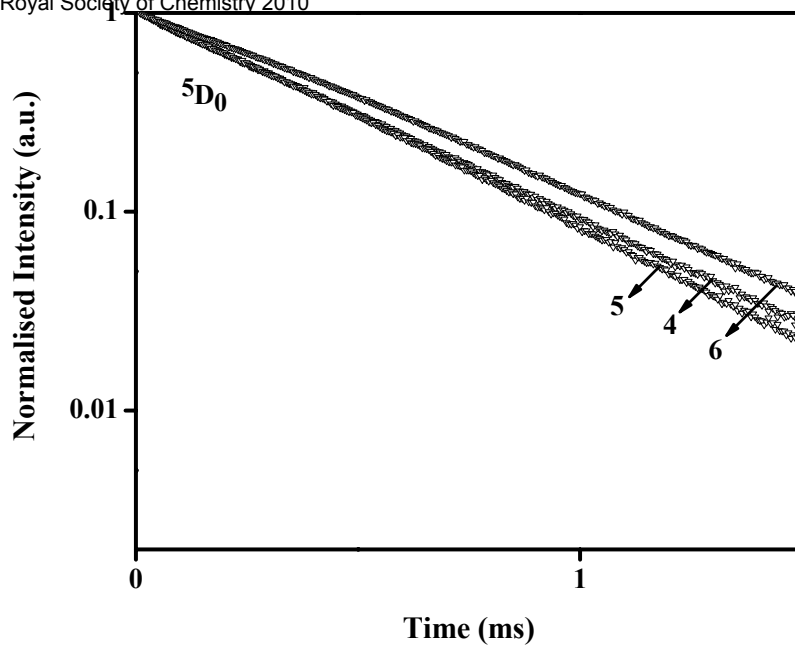

**Fig. S11** Luminescence decay profile of complexes **4**, **5** and **6** excited at 314, 300 and 280 nm, respectively and monitored at approximately 612 nm.

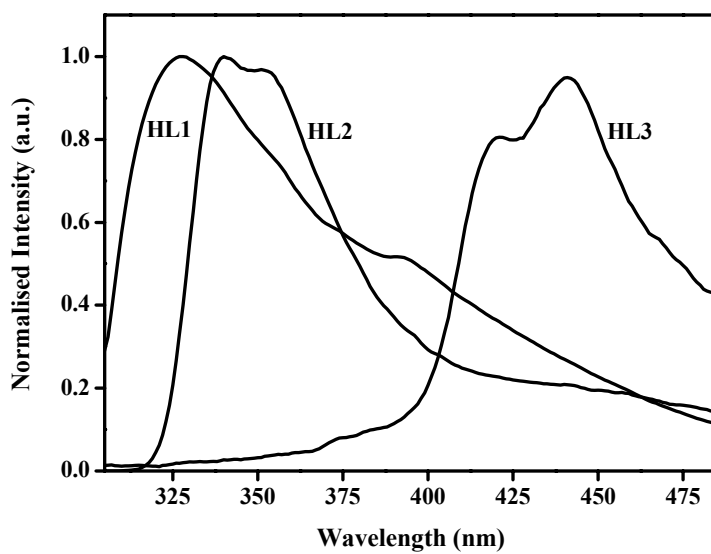

**Fig. S12** Room-temperature emission spectra of ligands HL1-HL3.

**Table S1** Infrared vibrational frequencies for the carboxylate functionalities of ligands HL1-HL3 and complexes **1-9**.

|          | $\nu_{\text{as}}(\text{C}=\text{O}) \text{ cm}^{-1}$ | $\nu_{\text{s}}(\text{C}=\text{O}) \text{ cm}^{-1}$ | $\Delta\nu_{(\text{C}=\text{O})} \text{ cm}^{-1}$ |
|----------|------------------------------------------------------|-----------------------------------------------------|---------------------------------------------------|
| HL1      | 1686                                                 | 1454                                                |                                                   |
| HL2      | 1678                                                 | 1454                                                |                                                   |
| HL3      | 1689                                                 | 1454                                                |                                                   |
| <b>1</b> | 1586, 1610                                           | 1380, 1439                                          | 230,147                                           |
| <b>2</b> | 1597, 1627                                           | 1395, 1423                                          | 232,174                                           |
| <b>3</b> | 1588, 1614                                           | 1350, 1424                                          | 264,164                                           |
| <b>4</b> | 1586, 1608                                           | 1380, 1432                                          | 228,154                                           |
| <b>5</b> | 1599, 1627                                           | 1396, 1423                                          | 231,176                                           |
| <b>6</b> | 1584, 1626                                           | 1338,1423                                           | 288,161                                           |
| <b>7</b> | 1586, 1610                                           | 1380, 1435                                          | 230,151                                           |
| <b>8</b> | 1599, 1628                                           | 1396, 1423                                          | 232,176                                           |
| <b>9</b> | 1589, 1615                                           | 1350, 1424                                          | 265,165                                           |



**Table S2** Values for the absorption maxima and molar absorption coefficients for ligands HL1-HL3 and compounds **1-9** in acetonitrile solution ( $c = 2 \times 10^{-5}$  M).

| Compound | $\lambda_{\max}$ $\pi$ - $\pi^*$ / ILCT (nm) | $\epsilon$ ( $\text{mol}^{-1}$ liter $\text{cm}^{-1}$ ) |
|----------|----------------------------------------------|---------------------------------------------------------|
| HL1      | 253                                          | $8.69 \times 10^3$                                      |
| HL2      | 260, 295                                     | $7.39 \times 10^3$                                      |
| HL3      | 238, 318                                     | $9.20 \times 10^3$                                      |
| <b>1</b> | 254                                          | $4.58 \times 10^4$                                      |
| <b>2</b> | 267, 299                                     | $3.86 \times 10^4$                                      |
| <b>3</b> | 239, 321                                     | $4.46 \times 10^4$                                      |
| <b>4</b> | 255                                          | $4.78 \times 10^4$                                      |
| <b>5</b> | 268, 299                                     | $4.21 \times 10^4$                                      |
| <b>6</b> | 239, 321                                     | $4.75 \times 10^4$                                      |
| <b>7</b> | 256                                          | $4.84 \times 10^4$                                      |
| <b>8</b> | 267, 299                                     | $4.35 \times 10^4$                                      |
| <b>9</b> | 239, 321                                     | $4.60 \times 10^4$                                      |

**Procedures for calculating radiative ( $A_{\text{RAD}}$ ) and nonradiative ( $A_{\text{NR}}$ ) decay rates, radiative lifetimes ( $\tau_{\text{RAD}}$ ), intrinsic quantum yields ( $\Phi_{\text{Ln}}$ ), energy transfer efficiencies ( $\Phi_{\text{sen}}$ ), and overall quantum yields ( $\Phi_{\text{overall}}$ ) for  $\text{Eu}^{3+}$  and  $\text{Tb}^{3+}$  complexes **1-6**.**

The overall quantum yield ( $\Phi_{\text{overall}}$ ) for a  $\text{Ln}^{3+}$  coordination compound is the product of the intrinsic quantum yield  $\Phi_{\text{Ln}}$  (measured upon f-f excitation), which reflects the extent of nonradiative deactivation processes that take place within the luminescent edifice, and the sensitization efficiency of the ligand ( $\Phi_{\text{sen}}$ ), which reflects the efficacy with which the latter transfers its excitation energy onto the metal ion.<sup>1</sup>

$$\Phi_{\text{overall}} = \Phi_{\text{sen}} \Phi_{\text{Ln}} \quad (1)$$

Here,  $\Phi_{sen}$  represents the efficiency of energy transfer from the ligand to the  $\text{Ln}^{3+}$  ion and  $\Phi_{Ln}$  represents the intrinsic quantum yield of the  $\text{Ln}^{3+}$  ion, which can be calculated as shown in Equation (2).

$$\phi_{Ln} = \left( \frac{A_{RAD}}{A_{RAD} + A_{NR}} \right) = \frac{\tau_{obs}}{\tau_{RAD}} \quad (2)$$

For the  $\text{Eu}^{3+}$  complexes, the radiative lifetime ( $\tau_{RAD}$ ) can be calculated using Equation (3),<sup>2</sup> assuming that the energy of the  ${}^5\text{D}_0 \rightarrow {}^7\text{F}_1$  transition (MD) and its oscillator strength are constant

$$A_{RAD} = \frac{1}{\tau_{RAD}} = A_{MD,0} n^3 \left( \frac{I_{TOT}}{I_{MD}} \right) \quad (3)$$

where,  $A_{MD,0}$  ( $14.65 \text{ s}^{-1}$ ) is the spontaneous emission probability of the  ${}^5\text{D}_0 \rightarrow {}^7\text{F}_1$  transition in vacuo,<sup>2</sup>  $I_{TOT}/I_{MD}$  is the ratio of the total area of the corrected  $\text{Eu}^{3+}$  emission spectrum to the area of the  ${}^5\text{D}_0 \rightarrow {}^7\text{F}_1$  band and  $n$  is the refractive index of the medium. An average index of refraction equal to 1.5 was employed.<sup>3</sup> The intrinsic quantum yield of  $\text{Tb}^{3+}$  ( $\Phi_{Tb}$ ) can be estimated by means of Equation (4) using the assumption that the decay process at 77 K in deuterated solvents is purely radiative.<sup>4</sup>

$$\phi_{Tb} = \frac{\tau_{obs(298K)}}{\tau_{RAD(77K)}} \quad (4)$$

The radiative lifetime ( $\tau_{RAD}$ ), intrinsic quantum yields ( $\Phi_{Ln}$ ), and sensitization efficiencies ( $\Phi_{sen}$ ) of the ligands for  $\text{Ln}^{3+}$  complexes **1-6** were calculated and are presented in Table 3. The quantum yields were measured for complexes **1-6** by employing the technique for powdered samples described by Bril *et al.*<sup>5</sup>

## References

- (a) M. Xiao and P. R. Selvin, *J. Am. Chem. Soc.*, 2001, **123**, 7067; (b) S. Comby, D. Imbert, C. Anne-Sophie, J.-C.G. Bünzli, L. J. Charbonniere and R. F. Ziessel, *Inorg. Chem.*, 2004, **43**, 7369.

2 (a) S. Viswanathan and A. de Bettenacourt-Dias, *Inorg. Chem.*, 2006, **45**, 10138; (b) Y. H. Kim, N. S. Baek and H. K. Kim, *Chem. Phys. Chem.*, 2006, **7**, 213.

3 (a) G. F. de Sa, O. L. Malta, C. de Mello Donega, A. M. Simas, R. L. Longo, P. A. Santa-Cruz and E. F. da Silva Jr, *Coord. Chem. Rev.*, 2000, **196**, 165; (b) D. B. Ambili Raj, S. Biju and M. L. P. Reddy, *Inorg. Chem.*, 2008, **47**, 8091.

4 (a) N. Sabbatini, M. Guardigli and J.-M. Lehn, *Coord. Chem. Rev.*, 1993, **123**, 201; I. Nasso, S. Bedel, C. Galaup and C. Picard, *Eur. J. Inorg. Chem.*, 2008, **12**, 2064.

5 A. Bril., A. W De Jager- Veenis, *J. Electrochem. Soc.*, 1976, **123**, 396.
